# Supplementary material for: N-Heterocyclic molecule-capped gold nanoparticles as effective antibiotics against multi-drug resistant bacteria
Source: Royal Society of Chemistry journal article supplement (doi:10.1039/c6nr03317b), 2016-01-01
Supplement: c6nr03317b1.pdf [file c6nr03317b1.pdf]

## Supporting Information

### N-heterocyclic Molecules-capped Gold Nanoparticles as Effective Antibiotics against Multi-drug Resistant Bacteria

Yan Feng,<sup>a,c</sup> Wenwen Chen,<sup>b,c</sup> Yuexiao Jia,<sup>c</sup> Yue Tian,<sup>c</sup> Yuyun Zhao,<sup>c</sup> Fei Long,<sup>c</sup> Yukui Rui<sup>a,\*</sup> and Xingyu Jiang<sup>c,\*</sup>

<sup>a</sup> College of Resources and Environmental Sciences, China Agricultural University, 2 YuanMingYuan West Road, HaiDian District, Beijing 100094, China.

<sup>b</sup> Guangdong Key Laboratory for Biomedical Measurements and Ultrasound Imaging, School of Biomedical Engineering, Health Science Center, Shenzhen University, Guangdong 518020, China.

<sup>c</sup> Beijing Engineering Research Center for BioNanotechnology & CAS Key Laboratory for Biological Effects of Nanomaterials and Nanosafety, National Center for NanoScience and Technology, 11 Beiyitiao, ZhongGuanCun, Beijing 100190, China

\* Corresponding author. Tel.: +86 10 8254 5558; fax: +86 10 8254 5631

E-mail: [ruiyukui@163.com](mailto:ruiyukui@163.com); [xingyujiang@nanoctr.cn](mailto:xingyujiang@nanoctr.cn).

Yan Feng and Wenwen Chen have equal contribution to the paper.

This SI includes the following contents:

The experimental section:

1. Chemical and materials
2. Synthesis of different heterocyclic molecules-capped gold NPs.
3. Characterization.
4. Antimicrobial test.
5. Cytotoxicity assay of gold NPs.
6. Superthin slices preparation for SEM and TEM observation.
7. Calculation of Numbers of Au Atoms and Pyrimidines per NP

The Figure S and Table S including:

1. **Figure S1.** The structure of our group previous screened molecules
2. **Figure S2.** TEM images of ATT-Au NPs, AHMT-Au NPs, MI-Au NPs, MTM-Au NPs, AMP-Au NPs and AMBT-Au NPs with the initial molar ratio (1:1) of N-heterocyclic molecules to HAuCl<sub>4</sub>
3. **Figure S3.** The diameter distribution of ATT-Au NPs, AHMT-Au NPs, MI-Au NPs, MTM-Au NPs, AMP-Au NPs and AMBT-Au NPs with different initial molar ratio (1:1 and 10:1) of N-heterocyclic molecules to HAuCl<sub>4</sub>
4. **Figure S4.** TEM images of ATT-Au NPs, AHMT-Au NPs, MI-Au NPs, MTM-Au NPs, AMP-Au NPs and AMBT-Au NPs with the initial molar ratio (10:1) of N-heterocyclic molecules to HAuCl<sub>4</sub> after one year
5. **Figure S5.** The results of XPS of Au NPs coated with different N-heterocyclic Molecules
6. **Table S1.** Components of NPs and surface charges in water at 25 °C
7. **Table S2.** Comparison of the antibacterial activity of different molar ratio of

heterocyclic molecules to Au NPs and surface charges in water at 25°C on *E.coli* and MDR *E.coli*.

## Experimental Section

- 1. Chemicals and materials.**  $\text{HAuCl}_4 \cdot 3\text{H}_2\text{O}$  (99.99%) was from Jinke Chemical Co., Ltd., China. 3-Amino-1,2,4-triazole-5-thiol (ATT), 4-Amino-3-hydrazino-5-mercapto-1,2,4-triazole (AHMT), 2-Mercaptoimidazole (MI), Methimazole (MTM), 2-Amino-6-mercaptopurine (AMP) and 6-Amino-2-mercaptobenzothiazole (AMBT) were from Sigma. Standard strains of *Escherichia coli* (ATCC 11775), *Pseudomonas aeruginosa* (ATCC 27853) and *Staphylococcus aureus aureus* (ATCC 6538P) were from China General Microbiological Culture Collection Center (Institute of Microbiology of Chinese Academy of Sciences) and a standard strain of *Klebsiella pneumoniae* (ATCC 13883) was from Agricultural Culture Collection of China. The clinical isolates, MDR *Escherichia coli*, MDR *Pseudomonas aeruginosa* and *S. aureus* MRSA were from local hospitals in China. Human umbilical vein endothelial cells (HUVEC) were a gift from Prof. Xiyun Yan at Institute of Biophysics, Chinese Academy of Sciences.
- 2. Synthesis of different heterocyclic molecules-capped gold NPs.** We stirred the mixture of heterocyclic small molecule (0.1 mmol, dissolved in 10 mL methanol, 200  $\mu\text{L}$  absolute acetic acid and 40 mg of Tween 80) and  $\text{HAuCl}_4 \cdot 3\text{H}_2\text{O}$  (0.1 mmol, dissolved in 20 mL methanol) for 10 min in the ice-water bath, added  $\text{NaBH}_4$  (0.3 mmol, freshly dissolved in 5 mL methanol) dropwise with vigorous stirring. We decreased the stirring speed and kept stirring the solution for another hour in the ice-water bath. We removed methanol in vacuum at 40°C, added an appropriate volume of deionized water into the residue, dialyzed (14 kDa MW cut off, Millipore) the solution for 48 h with deionized water, diluted it with deionized water, sterilized it through a 0.22  $\mu\text{m}$  filter (Millipore) and stored it at 4°C for use. Synthesis of other molar ratios of samples is similar, except we changed the concentration of heterocyclic molecules from 0.1 mmol to 1 mmol.
- 3. Characterization.** The concentrations of gold NPs and element of S were determined with inductively coupled plasma analysis (ICP, Elmer Optima 5300DV). We observed the morphologies of NPs using Tecnai G2 20 ST TEM from the American FEI company. And we tested zeta potential values of gold NPs with Zetasizer Nano ZS (Malvern Instruments).
- 4. Antimicrobial test.** We tested the antimicrobial activities of synthesized NPs using microtitre broth dilution method which determines the minimum inhibitory concentration (MIC) leading to the inhibition of microbial growth (NCCLS M7-A6, 2003). Disposable Corning 96-well plates were used for the tests. We diluted

the synthesized NPs solutions 2-128 times with 100  $\mu$ L of nutrient broth inoculated with the tested microbe at a concentration of  $2 \times 10^4$  CFU/mL to  $2 \times 10^5$  CFU/mL. The minimum inhibitory concentration (MIC) was observed after 24 h of incubation at 37 °C as the MIC of the tested substance that inhibited the growth of the microbial strain.

5. **Cytotoxicity assay of gold NPs.** Human umbilical vein endothelial cell (HUVEC) lines were cultured in the DMEM mixing medium (100 ml of the DMEM mixing medium includes 83 mL of Gibco DMEM, 15 mL of fetal bovine serum, 29.2 mg of Glutamine, 10,000 units of Penicillin and 10,000 units of Streptomycin). We incubated  $1 \times 10^4$  cells per well of HUVEC cell lines in 96-well plates with 0, 10, 20, 50, 100  $\mu$ g mL<sup>-1</sup> of Au NPs in 200  $\mu$ L of DMEM medium for 24 h. After discarding the supernatant, we added 10% (v/v) of the CCK-Kit solution in DMEM and incubated the sample at 37 °C for 2 h. The absorbance at 450 nm (with reference wavelength of 650 nm) was determined by Tecan infinite 200 multimode micro plate readers.
6. **Superthin slices preparation for SEM and TEM observation.** After six hours of treatment of *E.coli* and *S. aureus* with MI-Au at 10  $\mu$ g/mL and 25 $\mu$ g/mL on shaking bed at 200 rpm 37 °C, we chose 10  $\mu$ g/mL for *E.coli* and 25 $\mu$ g/mL for *S. aureus*, because at this concentration, we can most easily obtain bacterial cell samples and observe the changes of cell walls with SEM and TEM. Samples underwent fixing with 2.5% glutaraldehyde and 30%, 50%, 70%, 80%, 90%, 100% ethanol dehydration for SEM. TEM samples underwent fixing with 2.5% glutaraldehyde and 0.1% osmic acid, dehydrating with graded ethanol, and further cutting superthin slices and staining with 2% uranyl acetate and 0.2% lead citrate.
7. **Calculation of Numbers of Au Atoms and Pyrimidines per NP.** We calculate the number of gold atoms and ligands per NP using reported methods.<sup>1</sup> Gold atoms are close packed and form an fcc (Face Centred Cubic) structure in NPs. The number of gold atoms,  $N_{Au} = (V_{NP} \times APF) / V_{Au} = (4\pi r_{NP}^3 / 3 \times 0.7405) / (4\pi r_{Au}^3 / 3) = (d_{NP} / 2 \text{ nm})^3 \times 31$   

$$(0.144)^3 = (d_{NP} / \text{nm})^3 \times 31$$
where  $V_{NP}$  is the volume of asphere gold NP,  $V_{Au}$  is the volume of a gold atom, APF is atomic packing factor,  $r_{NP}$  and  $d_{NP}$  are the radius and the diameter of a sphere gold NP, and  $r_{Au}$  is the radius of a gold atom. The number  $N_s$  of thiolate ligands per NP,  $N_s = N_{Au} \times X$ ,  $X$  is the molar ratio of S to Au in NPs.

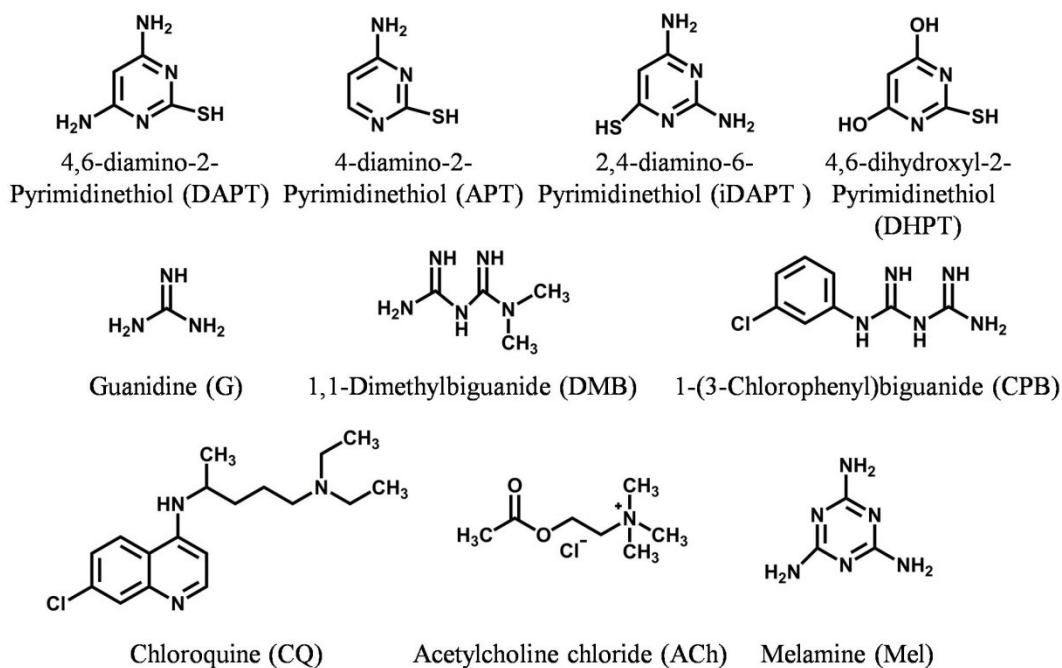

**Figure S1.** The structure of our group previous screened molecules.

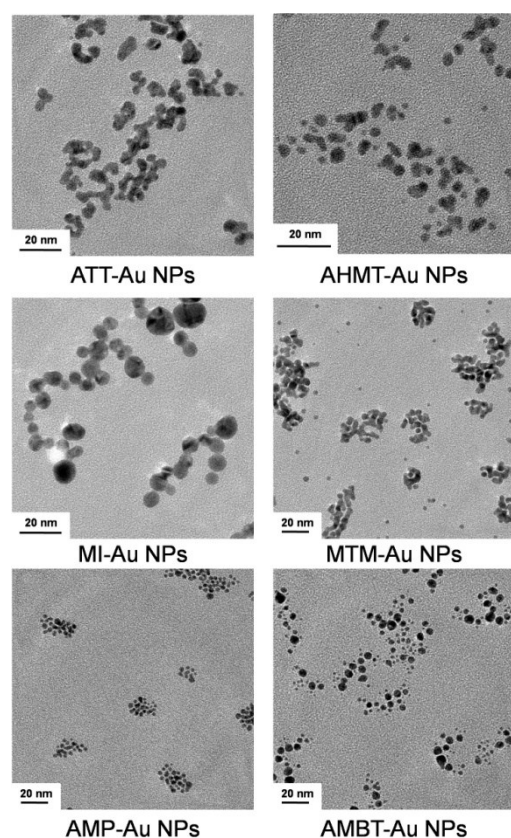

**Figure S2.** TEM images of ATT-Au NPs, AHMT-Au NPs, MI-Au NPs, MTM-Au NPs, AMP-Au NPs and AMBT-Au NPs with the initial molar ratio (1:1) of N-heterocyclic molecules to  $\text{HAuCl}_4$ .

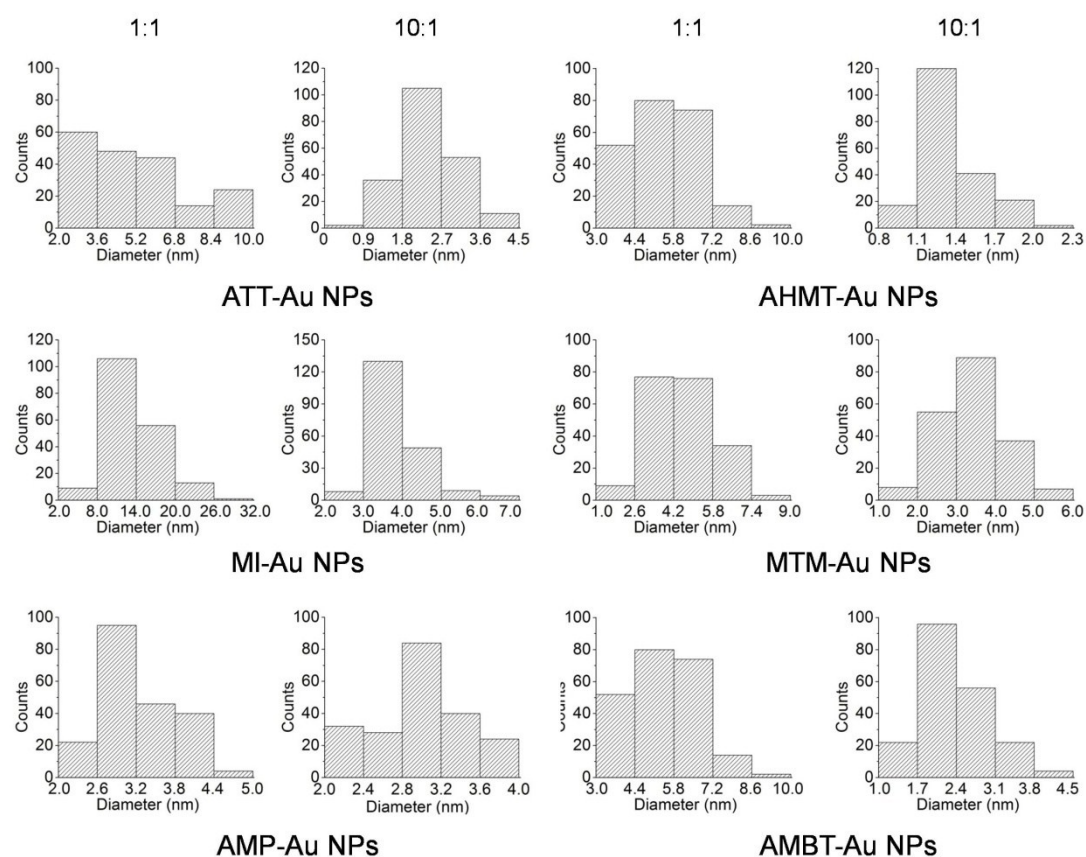

**Figure S3.** The diameter distribution of ATT-Au NPs, AHMT-Au NPs, MI-Au NPs, MTM-Au NPs, AMP-Au NPs and AMBT-Au NPs with different initial molar ratio (1:1 and 10:1) of N-heterocyclic molecules to  $\text{HAuCl}_4$ .

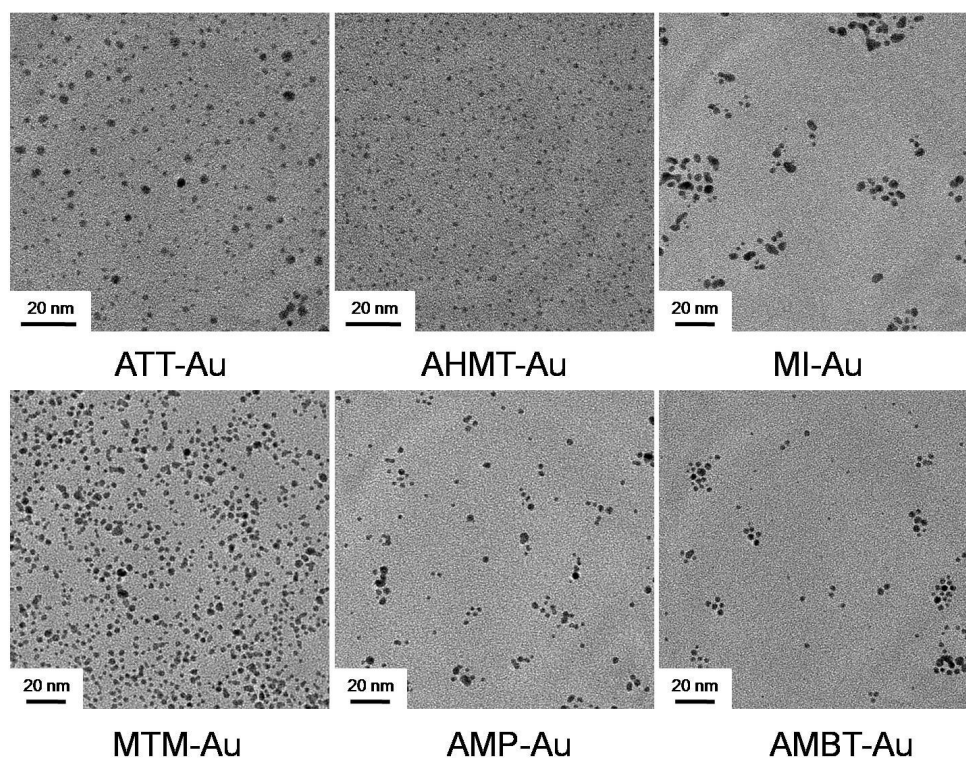

**Figure S4.** TEM images of ATT-Au NPs, AHMT-Au NPs, MI-Au NPs, MTM-Au



NPs, AMP-Au NPs and AMBT-Au NPs with the initial molar ratio (10:1) of N-heterocyclic molecules to HAuCl<sub>4</sub> after one year.

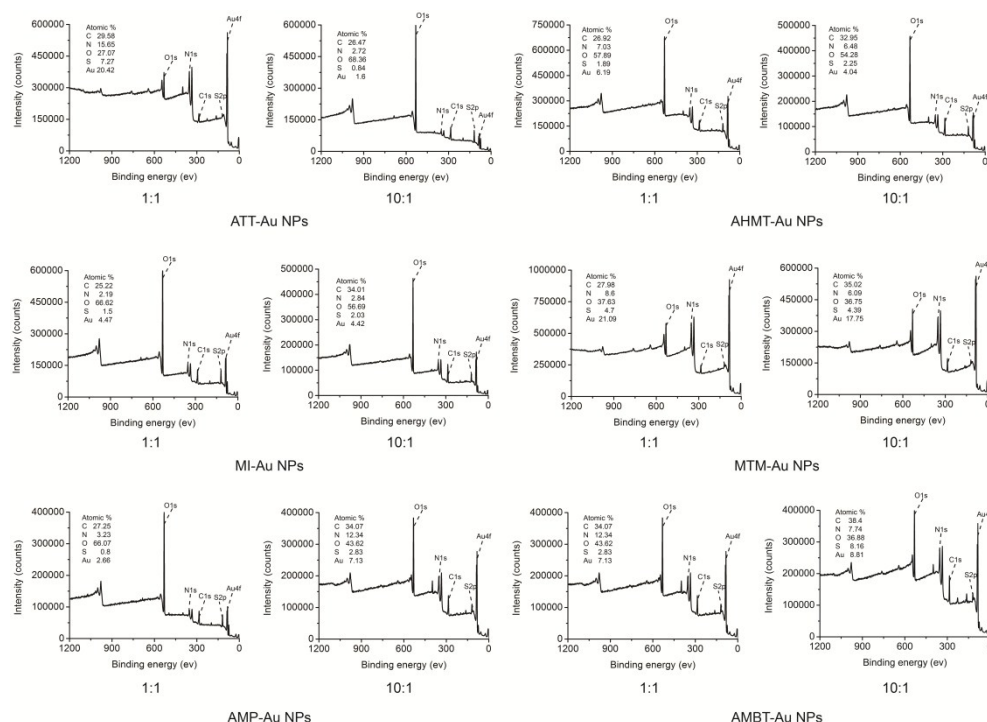

**Figure S5.** XPS characterization of Au NPs coated with different N-heterocyclic molecules.

**Table S1.** Components of Au NPs in water at 25 °C.

|                             | Molar ratio of<br>pyrimidine to<br>Au in NPs | Au atoms per<br>NP | N-heterocyclic per NPs |
|-----------------------------|----------------------------------------------|--------------------|------------------------|
| ATT:HAuCl <sub>4</sub> =1   | 0.36                                         | 15872              | 5714                   |
| ATT:HAuCl <sub>4</sub> =10  | 0.53                                         | 461                | 245                    |
| AHMT:HAuCl <sub>4</sub> =1  | 0.31                                         | 4854               | 1505                   |
| AHMT:HAuCl <sub>4</sub> =10 | 0.56                                         | 85                 | 48                     |
| MI:HAuCl <sub>4</sub> =1    | 0.34                                         | 70171              | 23858                  |
| MI:HAuCl <sub>4</sub> =10   | 0.46                                         | 1674               | 770                    |
| MTM:HAuCl <sub>4</sub> =1   | 0.22                                         | 6048               | 1331                   |
| MTM:HAuCl <sub>4</sub> =10  | 0.25                                         | 1240               | 310                    |
| AMP:HAuCl <sub>4</sub> =1   | 0.30                                         | 1124               | 337                    |
| AMP:HAuCl <sub>4</sub> =10  | 0.40                                         | 1114               | 334                    |
| AMBT:HAuCl <sub>4</sub> =1  | 0.4                                          | 4334               | 1733                   |
| AMBT:HAuCl <sub>4</sub> =10 | 0.92                                         | 445                | 409                    |

We calculate the number of gold atoms and ligands per NP using reported methods.<sup>1</sup>

**Table S2.** Comparison of surface charges in water at 25°C and the antibacterial activity on *E.coli* and *MDR E.coli* of Au NPs with different molar ratio of heterocyclic molecules to  $\text{HAuCl}_4$ .

|                                | Zeta Potential<br>(mV) | Minimum Inhibition<br>Concentrations ( $\mu\text{g/mL}$ ) |                      |
|--------------------------------|------------------------|-----------------------------------------------------------|----------------------|
|                                |                        | <i>E.coli</i>                                             | MDR<br><i>E.coli</i> |
| ATT: $\text{HAuCl}_4$ =1       | 20.4 $\pm$ 14.4        | 32                                                        | 32                   |
| ATT: $\text{HAuCl}_4$ =10      | 2.43 $\pm$ 7.72        | 4                                                         | 4                    |
| AHMT: $\text{HAuCl}_4$ =1      | 4.63 $\pm$ 13.0        | 16                                                        | 16                   |
| AHMT: $\text{HAuCl}_4$ =1<br>0 | 2.11 $\pm$ 8.75        | 4                                                         | 4                    |
| MI: $\text{HAuCl}_4$ =1        | 8.22 $\pm$ 9.79        | >128                                                      | >128                 |
| MI: $\text{HAuCl}_4$ =10       | 2.03 $\pm$ 11.2        | 4                                                         | 4                    |
| MTM: $\text{HAuCl}_4$ =1       | 2.52 $\pm$ 10.3        | >128                                                      | >128                 |
| MTM: $\text{HAuCl}_4$ =10      | 11.5 $\pm$ 9.45        | 16                                                        | 16                   |
| AMP: $\text{HAuCl}_4$ =1       | 22.4 $\pm$ 3.78        | 8                                                         | 8                    |
| AMP: $\text{HAuCl}_4$ =10      | 26.9 $\pm$ 8.34        | 8                                                         | 8                    |
| AMBT: $\text{HAuCl}_4$ =1      | 7.4 $\pm$ 3.78         | 16                                                        | 16                   |
| AMBT: $\text{HAuCl}_4$ =10     | 18.5 $\pm$ 3.05        | 8                                                         | 8                    |

#### References

1. Y. Y. Zhao, Y. Tian, Y. Cui, W. W. Liu, W. S. Ma and X. Y. Jiang, *J Am Chem Soc*, 2010, **132**, 12349-12356.
